# Supplementary material for: Comparison of photoselective green light laser vaporisation versus traditional transurethral resection for benign prostate hyperplasia: an updated systematic review and meta-analysis of randomised controlled trials and prospective studies
Source: PubMed Central journal article supplement — BMJ Open. 2019 Aug 21;9(8):e028855. doi: 10.1136/bmjopen-2018-028855 (PMC6707662; doi:10.1136/bmjopen-2018-028855), 2019-08-21
Supplement: bmjopen-2018-028855supp001.pdf [file bmjopen-2018-028855supp001.pdf]

**Comparison of photoselective green light laser vaporization versus traditional transurethral resection for benign prostate hyperplasia: an up-to-date systematic review and meta-analysis of randomized control trials and prospective studies**

**Search strategy in PUBMED**

((((((((((Hyperplasia, Prostatic) OR Prostatic Hypertrophy) OR Adenoma, Prostatic) OR Adenomas, Prostatic) OR Prostatic Adenomas) OR Prostatic Adenoma) OR Benign Prostatic Hyperplasia) OR Prostatic Hyperplasia, Benign) OR Prostatic Hypertrophy, Benign) OR Benign Prostatic Hypertrophy) OR Hypertrophy, Benign Prostatic)) AND (((((((((((Prostate Transurethral Resection) OR Prostate Transurethral Resections) OR Transurethral Prostate Resection) OR Prostate Resection, Transurethral) OR Prostate Resections, Transurethral) OR Resection, Transurethral Prostate) OR Resections, Transurethral Prostate) OR Transurethral Prostate Resections) OR TURP) OR TURPs) OR Prostatectomy, Transurethral) OR Prostatectomies, Transurethral) OR Transurethral Prostatectomies) OR Transurethral Prostatectomy)) AND (((PVP) OR photoselective vaporisation) OR green-light laser)

**The last quest was updated on December 20, 2018**
